# Class II Transactivator (CIITA) Enhances Cytoplasmic Processing of HIV-1 Pr55Gag

Kristen A. Porter, Lauren N. Kelley, Annette George, Jonathan A. Harton, Karen M. Duus\*

Center for Immunology and Microbial Disease, Albany Medical College, Albany, New York, United States of America

## Abstract

**Background:** The Pr55<sup>Gag</sup> (Gag) polyprotein of HIV serves as a scaffold for virion assembly and is thus essential for progeny virion budding and maturation. Gag localizes to the plasma membrane (PM) and membranes of late endosomes, allowing for release of infectious virus directly from the cell membrane and/or upon exocytosis. The host factors involved in Gag trafficking to these sites are largely unknown. Upon activation, CD4+ T cells, the primary target of HIV infection, express the class II transcriptional activator (CIITA) and therefore the MHC class II isotype, HLA-DR. Similar to Gag, HLA-DR localizes to the PM and at the membranes of endosomes and specialized vesicular MHC class II compartments (MIICs). In HIV producer cells, transient HLA-DR expression induces intracellular Gag accumulation and impairs virus release.

**Methodology/Principal Findings:** Here we demonstrate that both stable and transient expression of CIITA in HIV producer cells does not induce HLA-DR-associated intracellular retention of Gag, but does increase the infectivity of virions. However, neither of these phenomena is due to recapitulation of the class II antigen presentation pathway or CIITA-mediated transcriptional activation of virus genes. Interestingly, we demonstrate that CIITA, apart from its transcriptional effects, acts cytoplasmically to enhance Pr160<sup>Gag-pol</sup> (Gag-Pol) levels and thereby the viral protease and Gag processing, accounting for the increased infectivity of virions from CIITA-expressing cells.

**Conclusions/Significance:** This study demonstrates that CIITA enhances HIV Gag processing, and provides the first evidence of a novel, post-transcriptional, cytoplasmic function for a well-known transactivator.

**Citation:** Porter KA, Kelley LN, George A, Harton JA, Duus KM (2010) Class II Transactivator (CIITA) Enhances Cytoplasmic Processing of HIV-1 Pr55Gag. PLoS ONE 5(6): e11304. doi:10.1371/journal.pone.0011304

**Editor:** Maria G. Masucci, Karolinska Institutet, Sweden

**Received:** March 19, 2010; **Accepted:** May 26, 2010; **Published:** June 24, 2010

**Copyright:** © 2010 Porter et al. This is an open-access article distributed under the terms of the Creative Commons Attribution License, which permits unrestricted use, distribution, and reproduction in any medium, provided the original author and source are credited.

**Funding:** Albany Medical College start-up funds (KMD, JAH) and National Institutes of Health/National Cancer Institute (NIH/NCI) KO1CA095582 (JAH) supported this research. The funders had no role in study design, data collection and analysis, decision to publish, or preparation of the manuscript.

**Competing Interests:** The authors have declared that no competing interests exist.

\* E-mail: duusk@mail.amc.edu

## Introduction

HIV polyprotein Gag serves as a scaffold to promote assembly of progeny virions at cellular membranes [1] and recruits components of the vesicular protein sorting pathway to facilitate virus budding [2,3,4]. Concomitantly, the virally encoded protease begins to cleave Gag, which is required for complete virion maturation and infectivity [5,6,7]. Gag proteins can be detected at both the PM and the membranes of endosomes among different cell types, suggesting that budding is not limited to one cell-type specific locale [8,9,10,11,12,13,14,15,16]. Further, host factors which participate in targeting Gag trafficking to particular membranes are largely unknown. As Gag and infectious virus can originate from two cellular locations, two models for Gag trafficking have emerged. The first model proposes that following synthesis, Gag traffics to endosomal membranes, and upon exocytosis is deposited on the PM, where it serves as the site for productive virus assembly [14,17]. The second model proposes that Gag is first trafficked to the PM, where virus assembly occurs, and then excess Gag is internalized to intracellular compartments [14,18,19,20], that serve as sites of productive virus assembly [15,21].

MHC class II heterodimers follow a similar trafficking route, appearing at both the PM and specialized multivesicular bodies

(MVBs) called MHC class II containing compartments (MIICs) [22]. MHC class II is utilized by antigen presenting cells (APCs) to present exogenous processed antigen to CD4+ T cells [22,23,24]. MHC Class II genes, including: HLA-DR, -DP and -DQ and the accessory molecules, invariant chain (Ii) and HLA-DM, are transcriptionally activated by the class II transactivator (CIITA), the global regulator of coordinate class II MHC gene expression [25,26]. As CIITA is induced in CD4+T cells upon activation, these cells express MHC class II [27,28]. Upon synthesis, HLA-DR heterodimers are assembled in the ER and the immature complex (HLA-DR+ Ii) travels through the secretory pathway to MIICs, where the specialized HLA-DM chaperone loads the HLA-DR heterodimer with peptide [22,29,30]. Interestingly, both immature and mature forms of HLA-DR can be found at the PM and can be subsequently internalized to MIICs due to a di-leucine motif in the cytoplasmic tail of Ii (immature HLA-DR) and a di-leucine motif and/or ubiquitination of conserved lysine residues within the HLA-DR  $\beta$  chain (mature HLA-DR), respectively [22,29,31,32,33,34,35,36]. Therefore, a connection between HLA-DR and Gag trafficking would not be surprising as both have an alternative route to intracellular compartments by way of the PM. Indeed, expression of HIV-1 Nef, Vpu and Gag have been shown to alter HLA-DR trafficking [37,38,39,40]. In addition, HLA-DR is preferentially acquired on the viral envelope of budding virions,

which enhances virion infectivity and may play a role in bystander apoptosis of T lymphocytes [41,42,43]. Therefore, HLA-DR localization at virus assembly sites is not unexpected.

Finzi *et al.* (2006) addressed the contribution of MHC class II-induced MIIC formation to Pr55Gag trafficking by monitoring virus budding in the presence of transiently expressed HLA-DR heterodimers [8]. In HEK-293T cells expressing HLA-DR, there was a marked redistribution of Gag to intracellular compartments, and reduced virus release at the PM; mature virus budded into HLA-DR containing multivesicular bodies and was retained [8]. We hypothesized that recapitulating endogenous expression of the entire class II antigen presentation pathway in producer cells via expression of CIITA would restore infectious virus release and provide a more physiologically relevant model for HIV-1 assembly studies. As expected, stable or transient expression of CIITA did not induce intracellular retention of Gag. However, HLA-DR induced Gag retention could not be alleviated by transient co-expression with HLA-DM and/or Ii, or CIITA-mediated upregulation of the recycling endosome GTPase, Rab4B [44]. Further, mutating ubiquitinatable lysine residues or complete truncation of the cytoplasmic tails of the HLA-DR  $\alpha$  and  $\beta$  chains did not restore virus release. Rather, limiting the amount of HLA-DR DNA transfected into cells restored virus release and alleviated Gag retention. Curiously, CIITA expressing cells produced virus that was significantly more infectious than CIITA deficient cells, and this was independent of the class II antigen presentation pathway. CIITA enhances infectivity of virions from producer cells through a novel function, by improving maturation through an increase in viral protease-dependent Gag processing. Using a panel of CIITA mutants, we demonstrate that cytoplasmic CIITA increases Gag-Pol polyprotein levels. Overall, our work reveals a novel cytoplasmic, post-transcriptional function of CIITA, which is expressed upon T cell activation and is constitutively expressed in macrophages and dendritic cells, all known targets of HIV infection.

## Results

### CIITA expression does not induced HLA-DR-mediated Gag retention

Transient expression of the class II heterodimer, HLA-DR, induces intracellular accumulation of Gag and a marked reduction in extracellular virus release from producer cells [8]. This previous study focused on HLA-DR in the absence of Ii and HLA-DM, critical components of the antigen processing and presentation pathway which influence MHC class II trafficking. To determine if expression of the complete MHC class II pathway could overcome Gag and virus retention we used CIITA to coordinately express these genes. Cells were either transiently (pcCIITA) or stably (A293T-CIITA) transfected with CIITA (Figure S1) and HIV-1<sub>NL4-3</sub> DNA, and Gag localization was monitored by immunofluorescence and compared to cells transiently expressing the HLA-DR  $\alpha$  and  $\beta$  heterodimers (pcDR $\alpha\beta$ 1 $\beta$ 5), or vector-only (pcDNA3.1). As expected, a weak but uniform Gag signal was present in vector-only transfected cells (Figure 1Aa) and transient HLA-DR expression induced a marked redistribution of Gag as indicated by a dense, punctuate Gag staining pattern (Figure 1Ad). Conversely, Gag accumulation was not observed when CIITA was either transiently or stably expressed (Figure 1Ab or c, respectively). Therefore, transient expression of HLA-DR in producer cells does indeed lead to Gag retention, which is not observed in the presence of CIITA. However, recapitulation of the MHC class II pathway in *trans* (pcDR $\alpha\beta$ 1 $\beta$ 5+Ii+HLA-DM $\alpha\beta$ ), also resulted in dense accumulation of Gag signal (Figure 1Ae), suggesting that CIITA-mediated

coordinate activation of HLA-DR, -DM and Ii expression is insufficient to overcome Gag retention. Flow cytometric analysis confirmed these findings, as cells transfected with HLA-DR heterodimers and/or co-transfected with some or all of the components of the class II antigen presentation pathway stained as Gag<sup>hi</sup>, indicating Gag accumulation (Figure 1B and C). However, this population was absent in cells transiently or stably expressing CIITA (Figure 1B and C). Therefore, absence of Gag accumulation in CIITA expressing cells is likely not due to its transactivation of the MHC class II antigen presentation pathway.

### CIITA increases virion infectivity independently of HLA-DR and the class II pathway

To assess whether CIITA-mediated alleviation of Gag retention in class II expressing cells correlated with restored virus production, virus particle and infectious virus release were measured by p24 ELISA and GHOST cell infectivity assays, respectively. Virus release, both infectious and particle titers) were reduced when cells were transfected with either HLA-DR or other components of the MHC class II antigen presentation pathway (Figure S2), confirming a correlation between Gag retention and reduced virus titers in the presence of HLA-DR, as previously demonstrated [8]. These assays also demonstrate a dramatic increase in infectious virus release from CIITA-expressing cells as compared to cells expressing vector only (Figure 2A & S2), despite significantly fewer virus particles being released from a CIITA-expressing cell (as measured by pg/mL of p24 in the culture supernatant, Figure 2B & S2). Therefore, while fewer virus particles are released from a CIITA-expressing cell, those particles are significantly more infectious (Figure 2C).

Previously, HLA-DR incorporation into the envelope of budding virions was demonstrated to enhance virion infectivity [45,46]. To determine if CIITA-enhancement of virion infectivity was due to HLA-DR or other components of the class II antigen presentation pathway, we measured virion infectivity from cells expressing these proteins. However, virions from these cells were just as infectious as virions released from vector only controls, yet not as infectious as virions from cells either stably or transiently-expressing CIITA (Figure 2D). Therefore, CIITA enhancement of virion infectivity is independent of the MHC class II antigen presentation pathway. Together, these data suggest CIITA has two effects on the HIV replicative cycle in producer cells, both of which are independent of the MHC II antigen processing pathway; i) it does not induce HLA-DR, mediated intracellular retention of Gag and ii) it increases the infectivity of HIV virions.

### Rab4B does not alleviate HLA-DR mediated Gag retention

CIITA has been shown to upregulate expression of Rab4B, a small GTPase involved in endocytic recycling [44,47]. Therefore, we hypothesized that CIITA via the action of Rab4B, could increase Gag recycling back to the PM, thereby alleviating HLA-DR-mediated Gag retention. Commercially available Rab4 antibodies cannot distinguish between Rab4A and 4B. However, Krawczyk *et al.* (2007) demonstrated by chromatin immunoprecipitation that CIITA specifically associates with the Rab4B and not the Rab4A promoter [44]. Immunoblotting demonstrated that there is an increase in Rab4 in CIITA-expressing cells (Figure 3A), therefore it is likely that this is in the form of Rab4B. However, when Rab4B and HLA-DR were co-expressed in producer cells with the HIV-1<sub>NL4-3</sub> plasmid, it did not rescue intracellular retention of Gag (Figure 3B). In fact, infectious virus release from cells transiently co-expressing Rab4B and HLA-DR was further

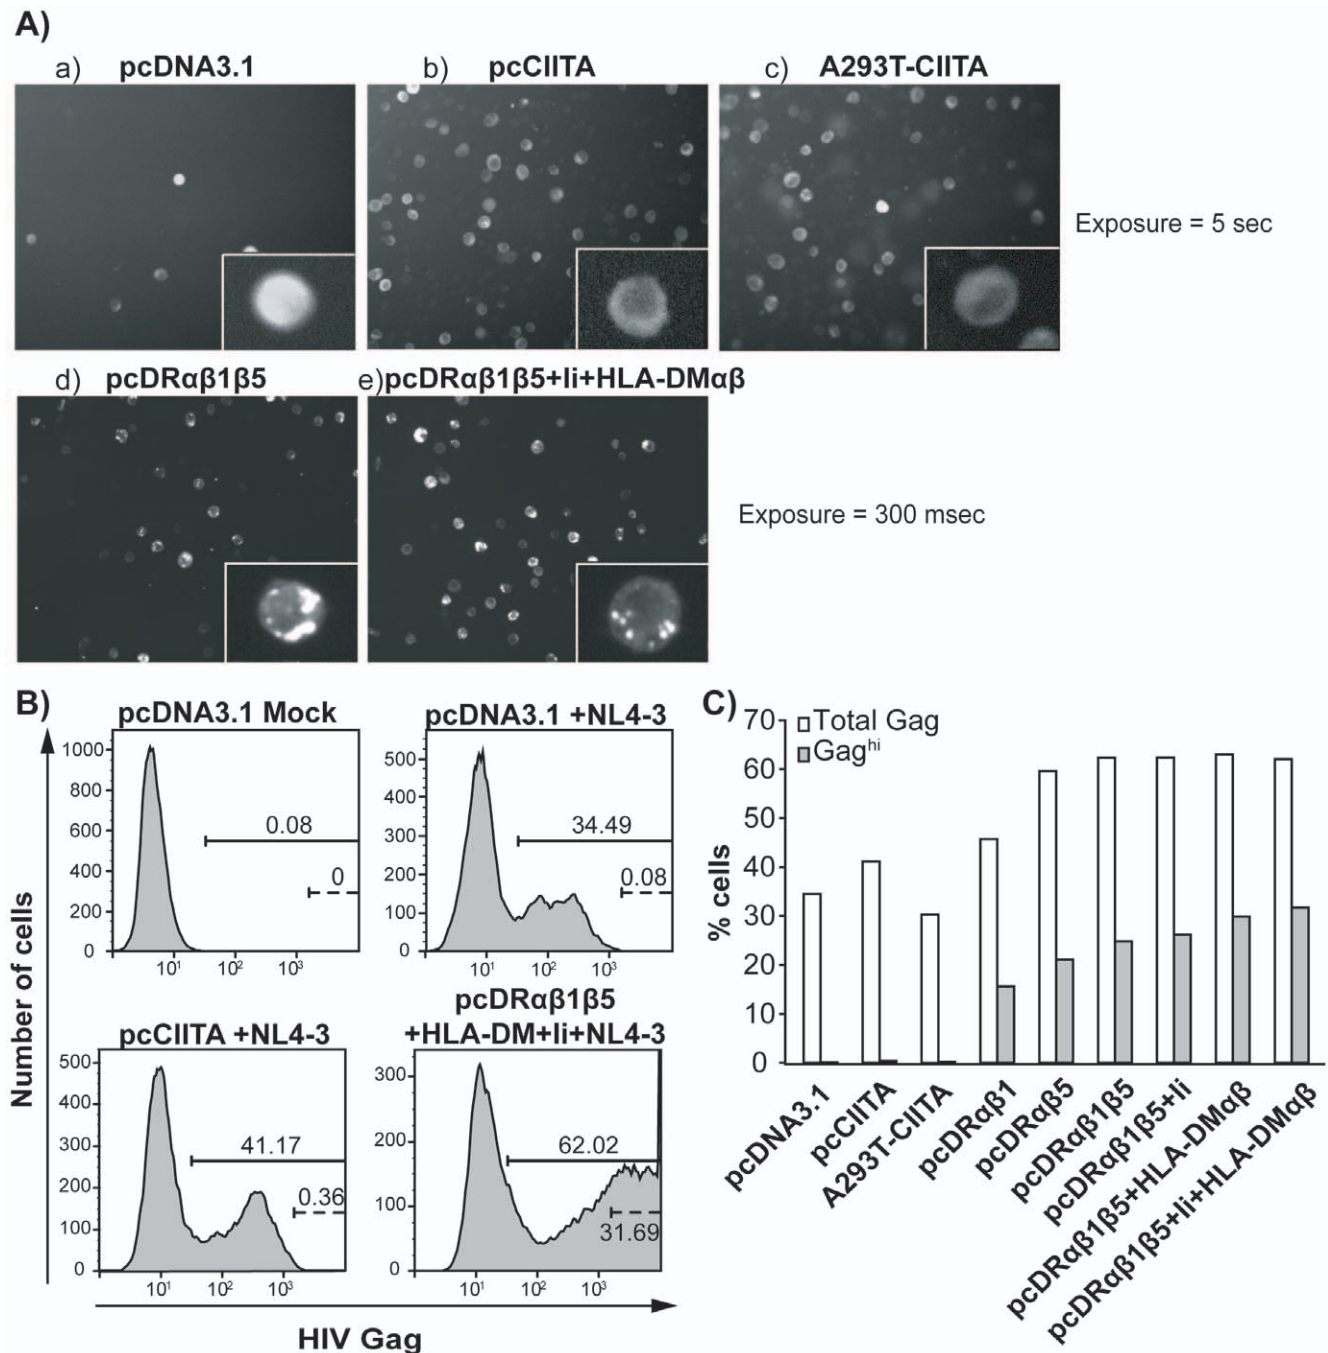

**Figure 1. CIITA does not induce HLA-DR-mediated Gag retention.** A293T cells were co-transfected with indicated plasmids and HIV-1<sub>NL4-3</sub> and following intracellular staining of Gag (using an antibody which recognizes the CA p24 domain of Gag), immunofluorescence microscopy (A) and flow cytometry (B) were performed. Total levels of Gag present in cells as well as cells which contain dense staining of Gag (Gag<sup>hi</sup>) are depicted (C). Data are representative of three independent experiments. doi:10.1371/journal.pone.0011304.g001

reduced, suggesting that Rab4B does not alleviate HLA-DR-mediated retention of Gag (Figure 3C).

Up until this point, we had not co-expressed CIITA with HLA-DR in producer cells to determine if CIITA could alleviate retention of Gag and/or restore infectious virus release as would be expected. Interestingly, when CIITA was transiently expressed with the HLA-DR heterodimers in producer cells, Gag still accumulated intracellularly and infectious virus production remained reduced (Figure 3B and C, respectively), suggesting that

expression of CIITA is not sufficient to compensate for HLA-DR-mediated Gag retention. However, when HLA-DR is endogenously expressed under the control of CIITA, retention is alleviated.

#### Gag retention is an artifactual effect of HLA-DR overexpression

Previously, Finzi *et al.* (2006) demonstrated that Gag retention in HLA-DR<sup>+</sup>, multivesicular bodies could be alleviated when the cytoplasmic tails of the HLA-DR  $\alpha$  and  $\beta$  chains were removed

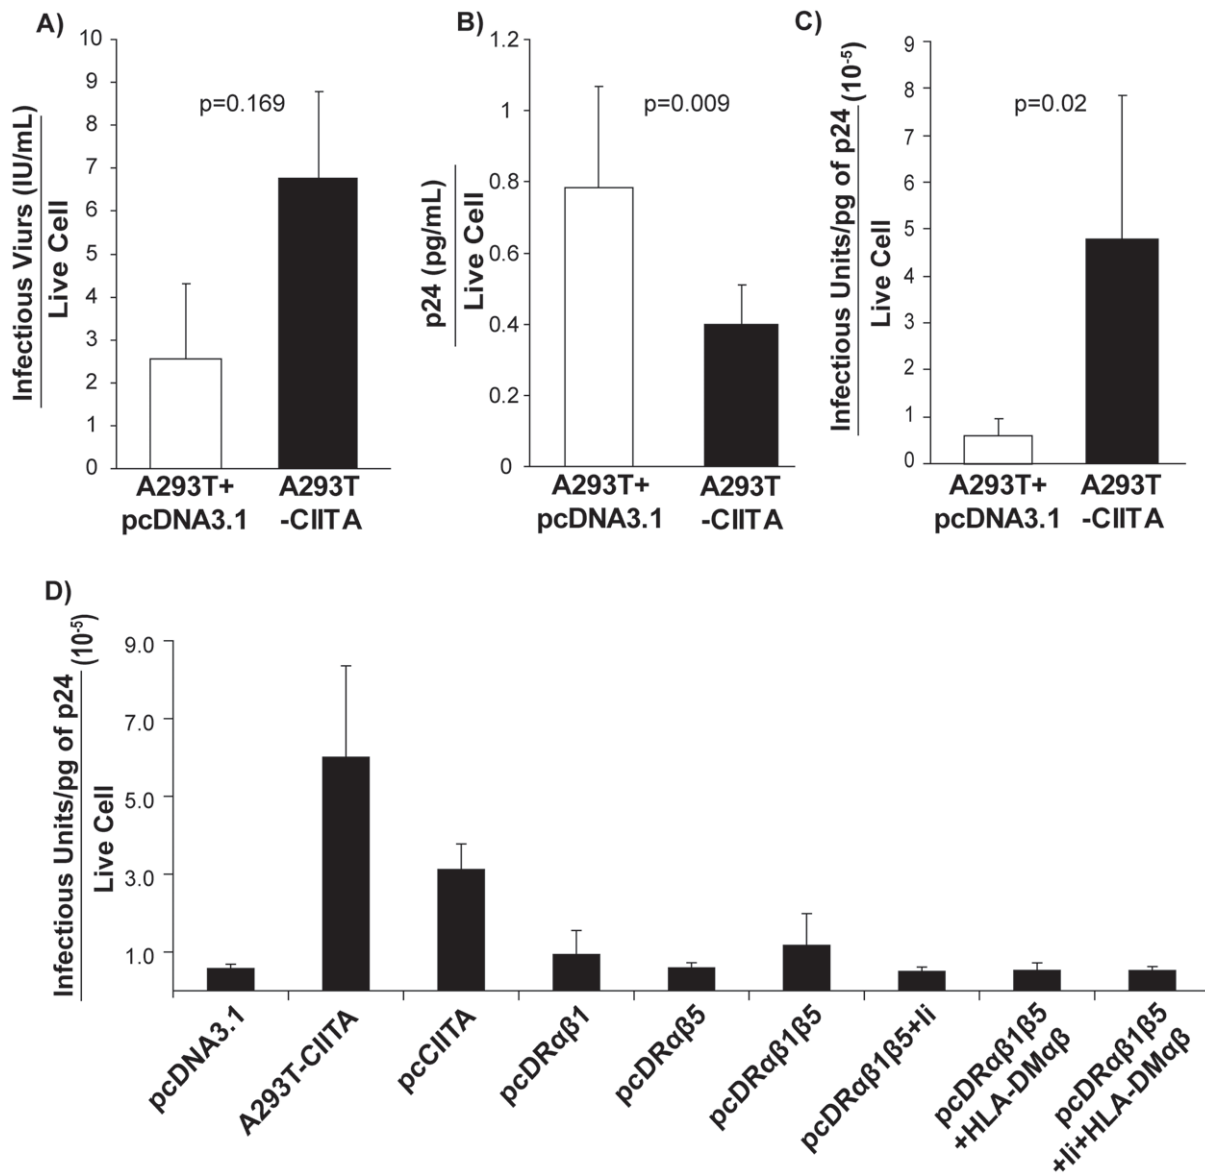

**Figure 2. CIITA increases virion infectivity independently of HLA-DR and the class II pathway.** Producer cells were transfected with HIV-1<sub>NL4-3</sub> and the indicated plasmids (A293T-CIITA is a stable clone) and at 48 h.p.t. infectious virus (A) and virus particle release (B) was determined by a GHOST infectivity assay and p24 ELISA, respectively. The number of infectious virions per total number virions released from a live cell was also determined (C). Similarly, the infectivity of virions from cells expressing HIV-1<sub>NL4-3</sub> and the indicated constructs was determined (D). Standard deviation of the mean for  $\geq 5$  independent experiments is presented. Statistical significance ( $p \leq 0.05$ ) was determined by a two-sample unequal variance student's T-test.

doi:10.1371/journal.pone.0011304.g002

[8]. Ubiquitination of a conserved lysine residue on the HLA-DR  $\beta$  chain induces intracellular accumulation of class II heterodimers in MHC class II compartments (MIICs) [35,36]. Thus, the ubiquitination state of HLA-DR, might influence Gag retention. To address this idea, Lys225Arg (pcDR $\alpha$  $\beta$ K225R) and Lys222/225Arg (pcDR $\alpha$  $\beta$ K222/225R) point mutations were made in the HLA-DR beta chain. Despite these mutations, HLA-DR expression on the surface of A293T cells was not significantly altered (flow cytometric data not shown), nor was intracellular retention of Gag alleviated or infectious virus release restored (Figure 4A and B, respectively). Therefore, we attempted to alleviate Gag retention and restore infectious virus release, as demonstrated by Finzi *et al.* (2006) [8], by complete truncation of the cytoplasmic tails of both HLA-DR  $\alpha$  and  $\beta$  (pcDR $\alpha$  $\Delta$ cyto and pcDR $\beta$  $\Delta$ cyto,

respectively). However, loss of either cytoplasmic tail (pcDR $\alpha$  $\Delta$ cyto and pcDR $\beta$  $\Delta$ cyto), or both cytoplasmic tails (pcDR $\alpha$  $\Delta$ cyto $\beta$  $\Delta$ cyto), from the heterodimer did not alleviate Gag retention and even further reduced infectious virus release from these cells (Figure 4A and B, respectively). Our results may differ from Finzi's because of the differences in cell type, or HLA-DR gene alleles, nevertheless they strongly suggest that transient HLA-DR expression in producer cells induces Gag retention. Further, flow cytometry to monitor surface HLA-DR expression demonstrates that transient transfection of HLA-DR induces an approximate half-log to log-fold increase in HLA-DR as compared to cells stably or transiently expressing CIITA, respectively (Figure S1). Therefore, it is possible that HLA-DR induced Gag retention is a consequence of HLA-DR overexpression in this transient system

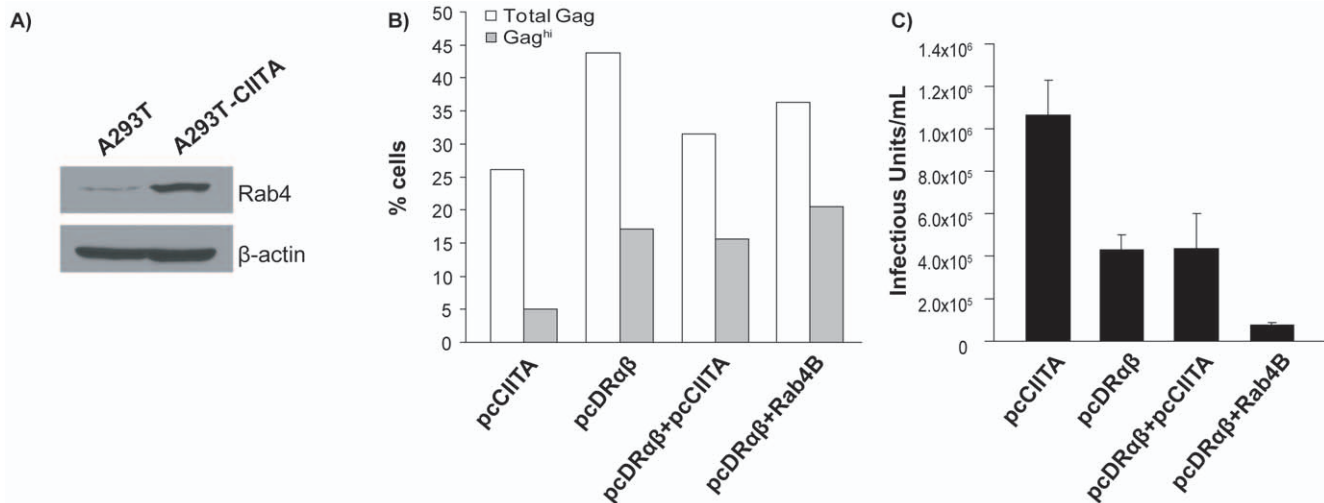

**Figure 3. Rab4B does not alleviate HLA-DR mediated Gag retention.** The level of Rab4 expressed in CIITA-expressing A293T cells was determined by immunoblotting, where  $\beta$ -actin served as a loading control (A). Cells were co-transfected with the indicated constructs and HIV-1<sub>NL4-3</sub> and Gag retention was monitored by intracellular staining and flow cytometry (B) and infectious virus release was measured via GHOST infectivity assays (C). Data are representative of three independent experiments and error bars indicate standard error. doi:10.1371/journal.pone.0011304.g003

and thus endogenous expression of HLA-DR via CIITA does not result in the same phenotype.

To test this possibility, virus producer cells were transfected with increasing amounts of HLA-DR in the presence of HIV-1<sub>NL4-3</sub> DNA, and infectious virus release was monitored. As HLA-DR expression increased, the level of infectious virus release decreased (Figure 4C). Further, while not statistically significant, there was a positive correlation ( $r=0.9954$ ) between Gag accumulation (Gag<sup>hi</sup>) and increasing HLA-DR expression (Figure 4D), suggesting Gag retention is likely related to HLA-DR overexpression. Similarly, when HLA-DM, which is structurally similar to HLA-DR, was overexpressed in producer cells, Gag retention was also induced (Figure 4D) and infectious virus release reduced (data not shown). As endogenous expression of the class II antigen presentation pathway by CIITA does not induce Gag retention and limiting expression of HLA-DR or -DM likewise has a limited effect on Gag retention in producer cells, these data collectively suggest that overexpression of the class II pathway alters Gag trafficking in producer cells leading to reduced infectious virus release. However, these data do not provide an explanation for the increased infectivity of virions released from CIITA-expressing cells.

### CIITA expression enhances virion maturation through increased Gag processing

Viral protease cleavage of the Gag and Gag-Pol polyproteins is required for virion maturation and infectivity [5,6]. The mature complement of HIV-1 structural proteins includes matrix (MA [p17]), capsid (CA [p24]), nucleocapsid (NC[p7]) and p6, as well as spacer peptides, SP1 [p2] and SP2 [p1] within Gag (Figure 5A). The enzymatic proteins, integrase (IN[p32]), reverse transcriptase (RT [p66/51]) and protease [p10], as well as the transframe octapeptide (TFP) and p6\* are generated from the Gag-Pol polyprotein (Figure 5A) [13,48,49,50,51]. As there is an increase in virion infectivity from CIITA-expressing cells, we hypothesized that the processing of Gag polyproteins may be enhanced in these cells. As suspected, analysis of cell lysates from equal numbers of HIV-1 transfected A293T-CIITA and A293T cells demonstrated a higher ratio of mature CAp24 to Pr55Gag in CIITA-expressing

cells (Figure 5 B&C), demonstrating that Gag processing in the presence of CIITA is enhanced. Additionally, increased levels of processing intermediates are present in A293T cell lysates. Specifically, the p41 (MA-CA-SP1) and p25 (CA+p2) products were increased (Figure 5 B&C) in these cells, indicating that Gag processing in the presence of CIITA is more efficient. Gag processing is also enhanced in cell-free virions from cells either transiently or stably expressing CIITA, as demonstrated by the increased levels of CAp24, and the loss of the p41 and p25 intermediate products relative to Pr55Gag (Figure 5D&E). Collectively, these results suggest that CIITA increases Gag polyprotein processing, leading to enhanced production of infectious virions.

### HLA-DR does not increase Gag processing

HLA-DR is incorporated into the HIV virion envelope [52] and is transcriptionally activated by CIITA, therefore its contribution to Gag processing was assessed. Virions from HLA-DR-expressing cells exhibited less Gag processing than virions from CIITA-expressing cells (Figure 5F, bottom panel). When virions from both cell lines were affinity-purified on HLA-DR binding columns, Gag processing was reduced in those produced in the HLA-DR-expressing cells as compared to virions from cells which express CIITA (Figure 5F, upper panel and 5G), suggesting that HLA-DR alone does not contribute to increased Gag processing. Similar to our previous results, there are fewer processing intermediates present in virions from CIITA-expressing cells, suggesting that CIITA expression enhances virion infectivity by increasing maturation through more complete Gag processing.

### CIITA enhancement of Gag processing is through the viral protease activity

Cleavage of the Gag and Gag-Pol polyprotein is mediated specifically by the virally-encoded protease [53,54,55]. We considered that CIITA might increase viral protease processing of Gag; thus, we examined Gag processing and infectious virus release from CIITA-expressing HIV producer cells in the presence of a protease inhibitor. If CIITA is increasing protease processing, such an enhancement should be overcome by lower doses of the



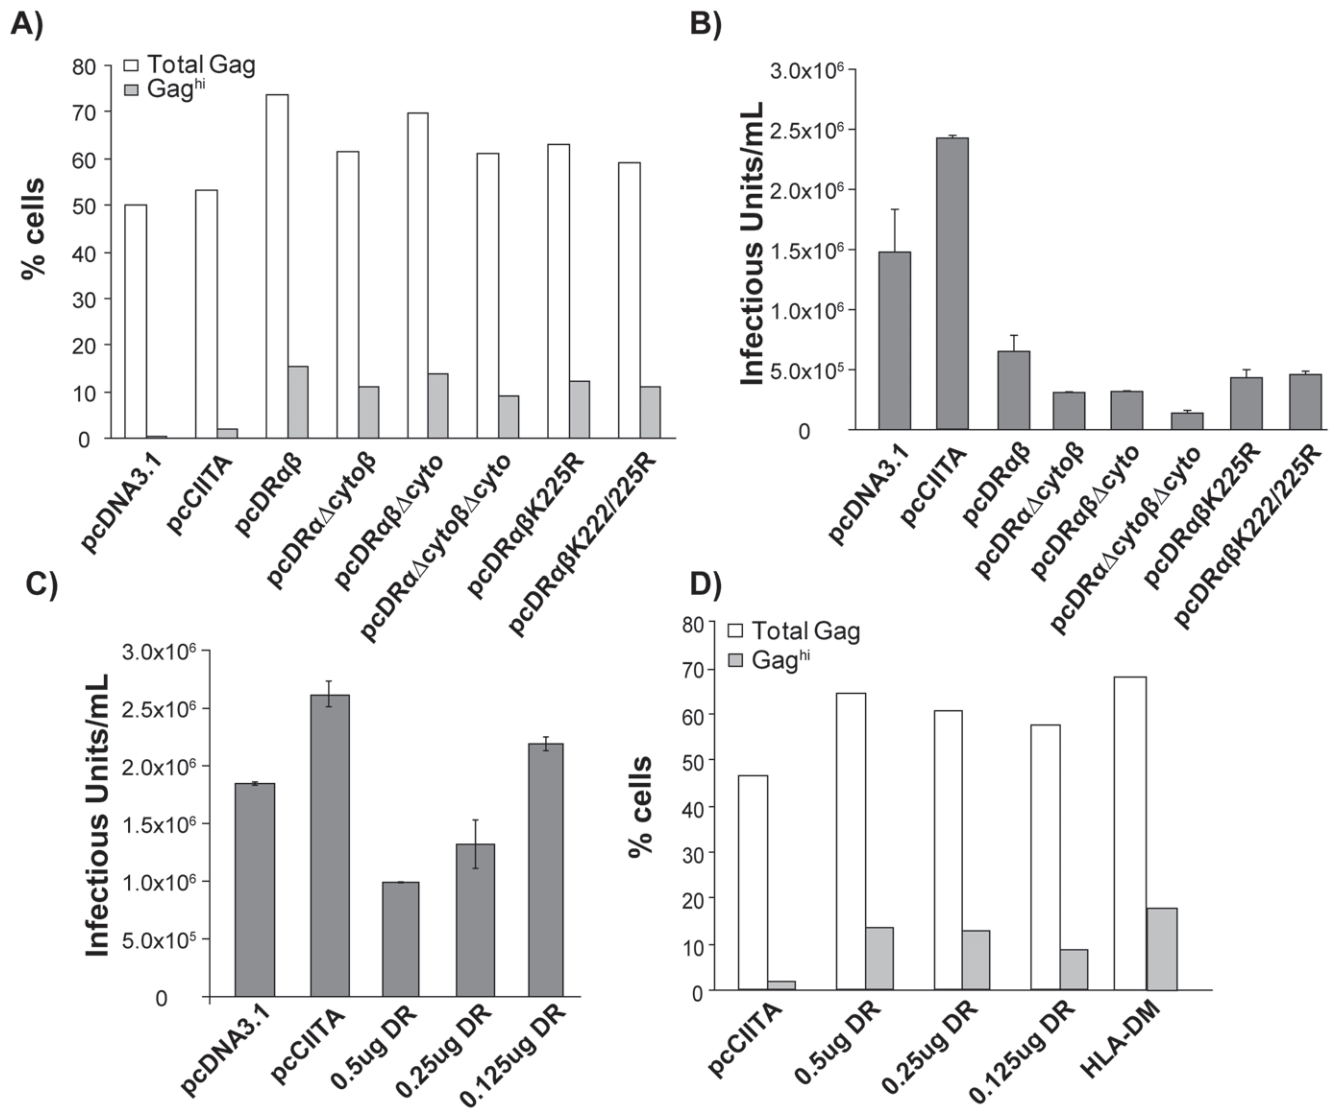

**Figure 4. MHC class II- induced Gag retention is a consequence of HLA-DR overexpression in producer cells.** Mutations were made in the HLA-DR cytoplasmic tails as indicated and transfected into producer cells at a 1:1 ratio with HIV-1<sub>NL4-3</sub> and Gag retention by flow cytometry (A) and infectious virus release (B) was monitored. Decreasing amounts of HLA-DR  $\alpha$  and  $\beta$  heterodimer constructs were transfected into producer cells with HIV-1<sub>NL4-3</sub> and infectious virus release (C) and Gag retention (D) were monitored. Data are representative of three independent experiments and error bars indicate standard error.  
doi:10.1371/journal.pone.0011304.g004

HIV protease inhibitor, Lopinavir. As expected, between concentrations of 0.6 and 1.25 nM of Lopinavir infectious virus release from CIITA-expressing cells was reduced to that of A293T cells treated with vehicle only (Figure 6A). To determine if the reduced Gag processing correlated with decreased infectious virus release, we monitored Gag cleavage by western blotting and as expected, between 0.6 and 1.25 nM of Lopinavir, Gag processing in virions from CIITA-expressing cells was returned to that of vehicle treated, vector-only control cells (Figure S3). These results directly demonstrate that CIITA-mediated enhancement of Gag processing and infectious virus release is through the HIV protease.

#### CIITA acts cytoplasmically to improve and enhance Gag processing

The only known function of CIITA is as a transcriptional co-activator; therefore, we thought it likely that it drives the expression of a gene which enhances viral protease-mediated

Gag processing. Therefore, we reasoned that expression of CIITA mutants which fail to localize to the nucleus should not mediate increased Gag processing or enhanced infectious virus release. To test this idea, a panel of CIITA mutants (GTP2, a magnesium ion coordination site mutant and GTP3, a guanine ring-binding domain mutant and L1035P, a point mutant in the C-terminal leucine rich repeat domain, which are all defective for nuclear localization and fail to activate HLA-DRA transcription [56,57,58]), were individually co-expressed with HIV-1<sub>NL4-3</sub> DNA, and infectious virus release and Gag processing were monitored. Interestingly, producer cells expressing these mutants also produced more infectious virus as compared to vector-only control (Figure 7A) and had increased Gag processing in both cell-bound virions and cell-free virions (Figure 7B and Figure S4, respectively). Loss of CIITA nuclear localization (and therefore coactivation potential), did not hinder increased Gag processing and infectious virus release, strongly suggesting that CIITA acts cytoplasmically to increase HIV virus maturation

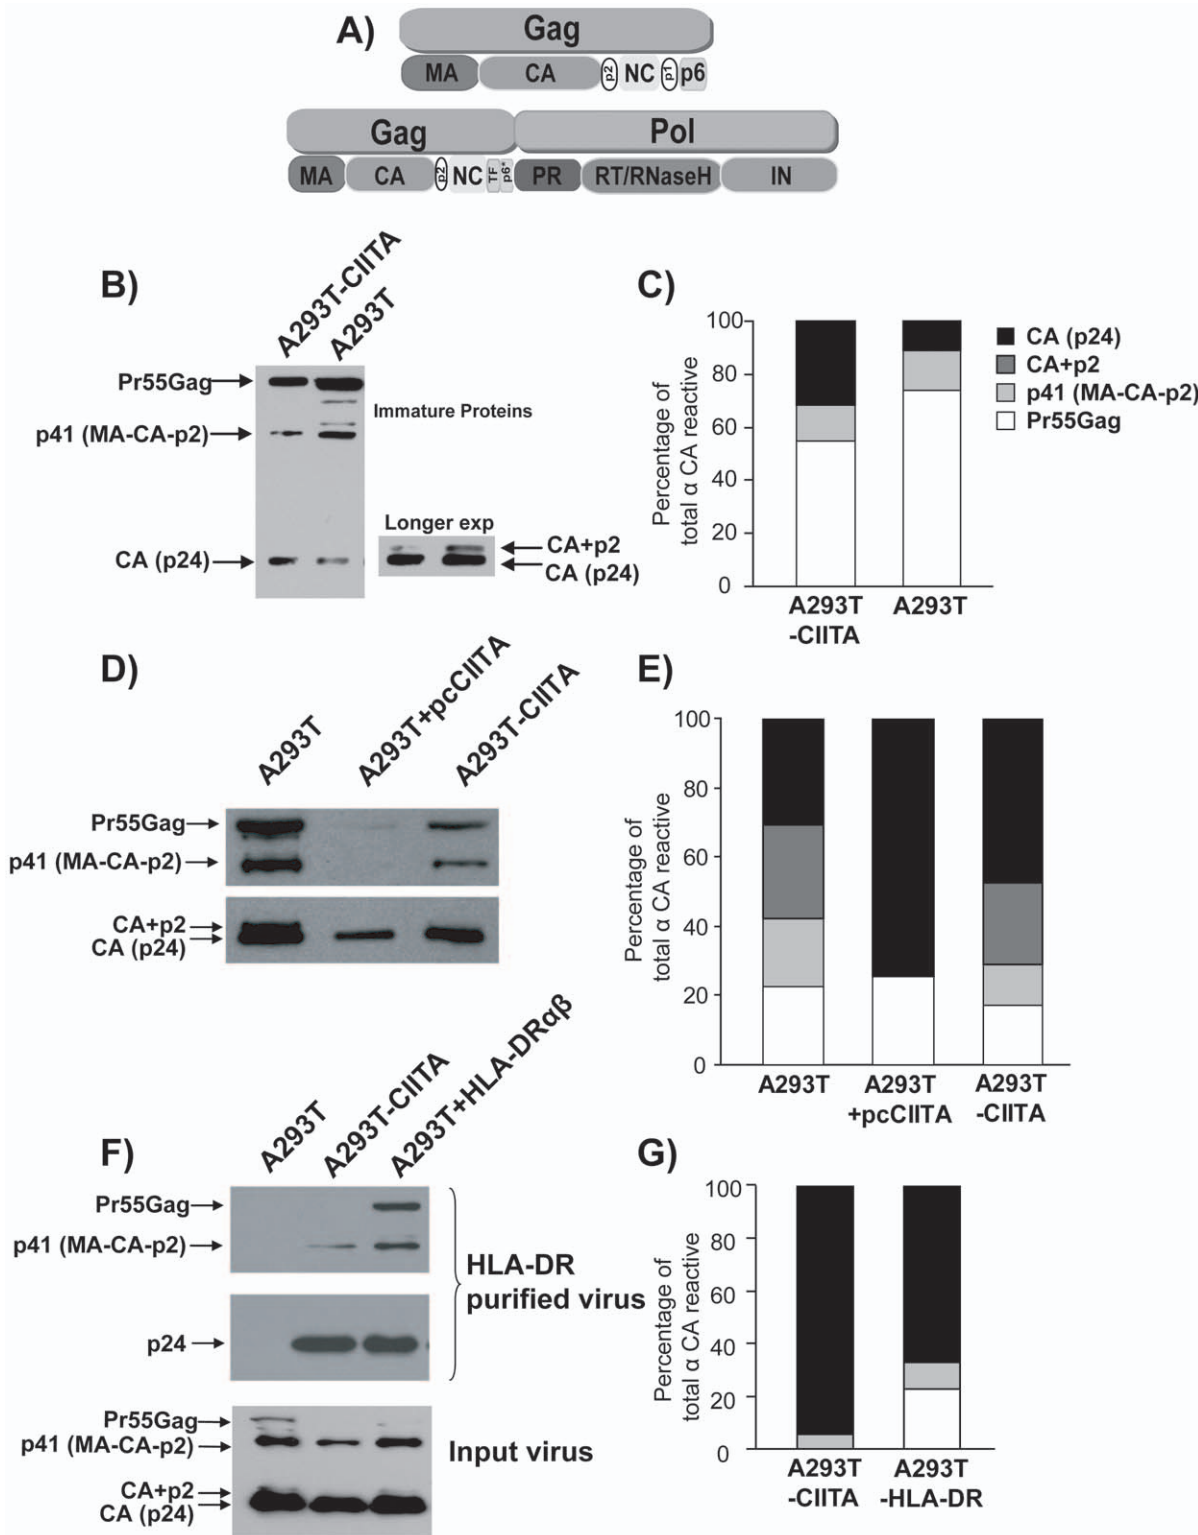

**Figure 5. CIITA enhances virion maturation through increased Gag processing.** Diagram of Pr55Gag and Pr160Gag-Pol and their respective cleavage products (A). Protein lysates from cell equivalents of HIV-1<sub>NL4-3</sub> transfected vector-only (A293T) or CIITA expressing (A293T-CIITA) cells (B) were western blotted with an antibody which recognizes CAp24 of Gag. Similarly, cell-free virions from vector-only (A293T), transient-CIITA expressing (pcCIITA) or stably-expressing CIITA (A293T-CIITA) (D), or virions affinity purified with biotinylated-anti-HLA-DR antibody (L243) on streptavidin-coated magnetic beads (F, top panel, where bottom panel is input control virus), were western blotted for Gag processing. Densitometric analysis of western blots was performed and quantitative analysis of Gag cleavage products is presented as percentage of total reactive bands (C, E and G). Data are representative of three independent experiments.  
 doi:10.1371/journal.pone.0011304.g005

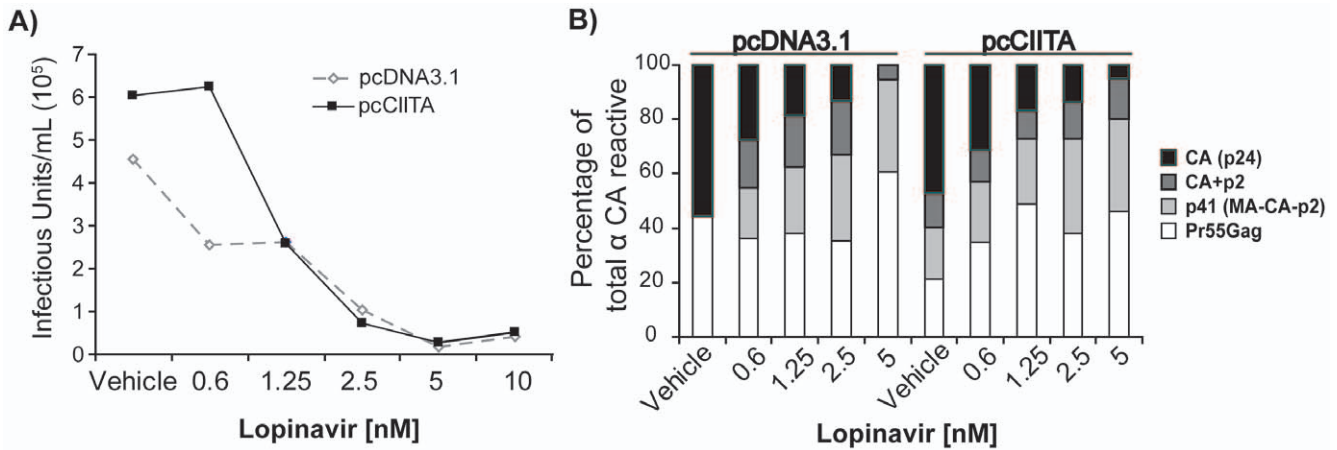

**Figure 6. CIITA enhancement of Gag processing and viral infectivity is through the viral protease.** Following co-transfection with vector-only (pcDNA3.1) or pcCIITA and HIV-1<sub>NL4-3</sub> producer cells and were treated with indicated concentrations of Lopinavir and 17 h later infectious virus titers were determined by GHOST assay (A) and Gag processing was measured via western blotting with antibody against CAp24 followed by densitometric analysis of Gag cleavage products (B). Data are representative of three independent experiments. doi:10.1371/journal.pone.0011304.g006

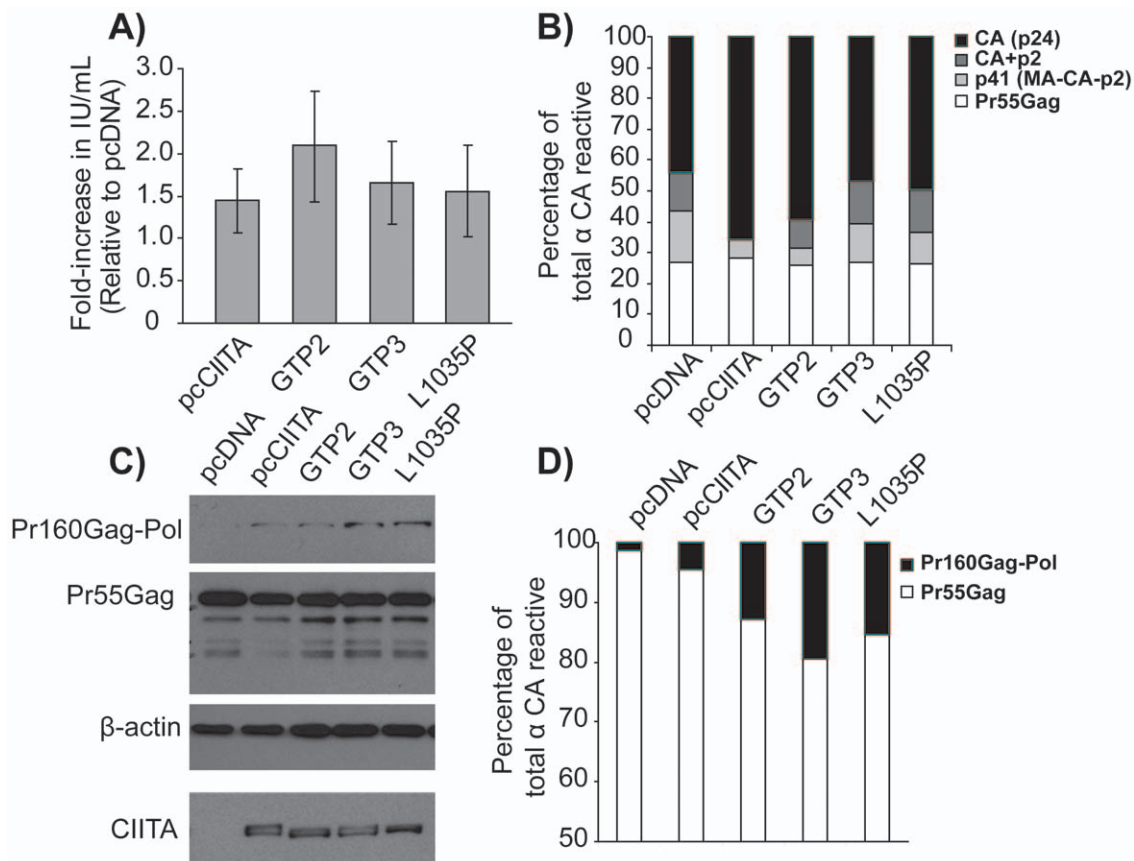

**Figure 7. CIITA cytoplasmically increases Pr160Gag-Pol levels.** Producer cells were transfected with the indicated CIITA constructs and HIV-1<sub>NL4-3</sub>; 48 h later infectious virus titers were determined by GHOST assay (A,  $n > 2$ , error bars rep. standard deviation of the mean). Gag processing was measured via western blotting with antibody against CAp24 and densitometric analysis of Gag cleavage products (B). Producer cells were transfected with indicated constructs and then 16 hours later with HIV-1<sub>NL4-3</sub> before treatment with 80 nM Lopinavir at 4.5 hours post-transfection. 17 hours later, cell lysates were blotted with the indicated antibodies (C) and western blotting with antibody against CAp24 followed by densitometric analysis allowed for the determination of the percentage of Gag-Pol and Gag, following normalization to  $\beta$ -actin (D). Unless indicated, data are representative of three independent experiments. doi:10.1371/journal.pone.0011304.g007



independent of its transactivation function. We further evaluated CIITA transactivation potential as a mechanism of enhanced virus release utilizing a different model system. NIH 3T3 BALB/c cells (expressing human p32 to allow for virus like particle production [59]) expressing CIITA and transfected with an LTR-deficient HIV genome construct (pcHIV PAL), under control of a CMV promoter had a dramatic increase in virus-like particle production as compared to NIH 3T3 cells in the absence of CIITA (Figure S5). This result provides further evidence that CIITA enhancement of virus production is independent of its transactivation potential on the HIV LTR.

### CIITA increases the viral protease through increased Gag-Pol levels

To determine the mechanism by which CIITA mediates protease activity in these cells, we analyzed the expression of the Gag and Gag-Pol in CIITA-expressing cells. Expression of the HIV protease is extremely toxic to cells, and is thus very tightly regulated during virus replication [60,61,62]. The viral protease arises from the alternative Gag translation product (Figure 5A), Gag-Pol which, accounts for only 2–10% of Gag polyproteins and results from ribosomal frameshifting at a conserved heptamer “slippery sequence” and a secondary stem-loop structure on *gag-pol* transcripts [51,63]. Therefore, increased viral protease-mediated processing of the Gag polyproteins from CIITA-expressing cells may be due to an increase in overall viral protease levels, due to increased Gag-Pol synthesis. To establish the ability of CIITA to mediate the enhanced production of HIV protease, cells were transiently co-transfected with either CIITA or pcDNA and HIV-1<sub>NL4-3</sub> DNA, and were treated with 80 nM of Lopinavir to inhibit the majority of Gag polyprotein processing. Gag-Pol levels relative to Gag were then determined by western blotting. While 1–2% of all Gag polyprotein in cell lysates of vector-only cells was in the form of Gag-Pol, expression of CIITA increased this level to almost 5% (Figure 7C and D), indicating that CIITA increases Gag-Pol levels in virus producer cells. We also measured the potential of the cytoplasmic CIITA mutants to increase Gag-Pol levels relative to Gag and, interestingly, Gag-Pol made up approximately 13, 20 and 15% of all Gag polyproteins in GTP2, GTP3 and L1035P –expressing cells, respectively. This result further demonstrates a novel transcription-independent role for cytoplasmic CIITA during HIV infection, where CIITA enhances Gag-Pol protease expression, which subsequently enhances virus maturation and infectivity.

### Discussion

Finzi *et al.* (2006) demonstrated that transient overexpression of HLA-DR heterodimers in HEK-293 cells lead to redistribution of Gag and intracellular accumulation of infectious virus in multivesicular bodies (MVBs) [16]. We speculated that complete expression of the antigen presentation pathway, through expression of CIITA, would alleviate this phenotype in virus producer cells. Interestingly, we noticed two phenomena: i) CIITA did not induce intracellular retention of Gag or impair virus release in producer cells despite expression of HLA-DR and ii) the virus released from cells expressing CIITA was significantly more infectious. Upon investigation of CIITA-mediated alleviation of HLA-DR-induced Gag retention, we found that this effect was not due to the lack of Ii or HLA-DM (key components of antigen presentation), as had been expected, nor was it a consequence of Rab4B expression in these cells. Further, when lysine residues in the HLA-DR chain were mutated or both of the HLA-DR chain cytoplasmic tails were truncated, Gag was still retained and virus

release inhibited. In addition, when CIITA was expressed in conjunction with HLA-DR this effect could not be alleviated, suggesting that Gag retention is a consequence of HLA-DR overexpression. Indeed, retention of Gag is directly correlated to levels of HLA-DR expression. Further, we did not observe Gag retention when class II antigen presentation pathway genes were expressed at endogenous levels via CIITA expression. Overexpression of HLA-DM, which is structurally similar to HLA-DR also induced Gag retention, suggesting that retention of Gag is a likely consequence of altered trafficking of overexpressed class II antigen presentation pathway components rather than a physiologically relevant phenomenon.

Despite observing similar HLA-DR and Gag retention/reduced virus release effects as Finzi *et al.* (2006), our results differed in that we did not observe the requirement for intact HLA-DR  $\alpha$  and  $\beta$ -chain cytoplasmic tails for the induction of Gag retention. In our hands, when the ubiquitinatable lysine residues in the HLA-DR  $\beta$ -chain were mutated or the cytoplasmic tails of the HLA-DR dimer were completely removed, there was no alleviation of Gag retention or virus release. Beyond the obvious differences between the previous work [8] and our own (i.e. provirus construct and cell type), our mutant data may differ from theirs because arginine residues were substituted for lysine 215 and tyrosine 220 residues in the HLA-DR  $\alpha$  and  $\beta$  chain, respectively, in order to ensure stabilization of the truncated HLA-DR molecule at cellular membranes. These differences in mutant constructs may potentially explain discrepancies in our results.

We also observed that expression of HLA-DM was sufficient to induce Gag retention and impede virus release from cells. However, Finzi *et al.* (2006) did not observe retention in the presence of HLA-DM or HLA-DO [8]. This difference may be explained by their use of a bicistronic construct for expression of the HLA-DM heterodimer; however, this strategy was also used to express HLA-DR, which still induced retention [8]. Irrespective of these differences, Gag retention and loss of virus release correlates with increasing HLA-DR expression. These results do not exclude the possibility that HLA-DR and Gag trafficking may be linked. Indeed, we have demonstrated that Gag co-immunoprecipitates with HLA-DR from CIITA expressing cells and this interaction is independent of the cytoplasmic tails of HLA-DR (data not shown). Further, other HIV proteins may be linked to class II trafficking. Stumptner-Cuvelette *et al.* (2003) and Chaudhry *et al.* (2009), have independently demonstrated that HIV Nef induces internalization of surface class II in epithelial and monocytic cell lines, respectively [37,64]. However, we did not observe downregulation of HLA-DR from the cell surface, following transfection of the HIV genome into CIITA-expressing epithelial cells (data not shown) or HIV infection of CIITA-expressing CD4<sup>+</sup> T cells (unpublished data). Further, Gluschankof and Suzan demonstrated that expression of Gag-Pol restored HLA-DR presence at the cell surface in the H78-C10.0 line, a T cell clone deficient for surface HLA-DR expression [40]. Collectively, our work and that of others suggests a link between HLA-DR and Gag trafficking, where localization may be cell-type dependent.

One of the more interesting findings of this study is that while overall viral titers from CIITA-expressing cells decrease the infectivity of these particles is significantly enhanced. Increased infectivity was due to improved virion maturation in a viral protease-dependent manner. Not only was processing to capsid p24 more complete in CIITA expressing cells, but vector-only control cells and those only expressing HLA-DR contained increased levels of processing intermediates. The presence of higher levels of processing intermediates in virus produced in these cells may help explain the reduced infectivity, as studies in both

MLV [65] and HIV [7] demonstrate that partially cleaved Gag products act transdominantly to reduce virion infectivity through reduced reverse transcription of viral RNA, despite the presence of functional Reverse Transcription polymerase [7].

Next we demonstrated that CIITA increased Gag processing through the viral protease and evaluated whether this enhancement was a consequence of CIITA-mediated transcriptional activation. The CIITA L1035P mutant, which fails to translocate to the nucleus [58], demonstrated increased Gag processing and virus release compared to vector-only control, suggesting a cytoplasmic role for CIITA in the later stages of the HIV infection cycle. This does not preclude the possibility that an undetectable level of CIITA L1035P might translocate to the nucleus. However, no L1035P was detected in the nucleus after a 24 hour treatment with the nuclear export inhibitor, leptomycin B [58]. Further, the predominantly cytoplasmic GTP-binding CIITA mutants, GTP2 and GTP3, had a similar increase in infectious virus release versus vector-only expressing cells.

Previously, it was demonstrated that increased Gag-Pol levels severely impair virion infectivity through disruption of RNA genome dimerization [62]. Further, HIV protease is known to be toxic to cells as it leads to the production of the novel Procaspase 8 cleavage product, Casp8p41, which induces apoptosis through loss of mitochondrial membrane potential [66]. Therefore, we would expect that virions from CIITA-expressing cells would be reduced in titer and infectivity, as there is increased Gag-Pol and protease. However, while overall viral particle numbers (as measured by p24 ELISA) from CIITA expressing cells were decreased, the infectivity of these virions was significantly increased when calculated by infectious units per pg p24. Interestingly, at 0.6 nM Lopinavir, the infectivity of virions from CIITA-expressing cells increased over vehicle-treated controls, despite reduced Gag processing. Further, the mutants of CIITA, which produced the highest level of Gag-Pol, did not demonstrate a linear increase in Gag processing or virion infectivity, which may be explained by previous work demonstrating that increased Gag-Pol levels impairs viral infectivity [61,62]. Therefore it is likely that CIITA is capable of increasing Gag-Pol levels to a point which can impede virus maturation, albeit not enough to reduce it to levels observed from vector-only expressing cells. Therefore, overall infectivity of virions is increased from cells expressing CIITA despite an altered Gag to Gag-Pol ratio. Future studies should focus on how CIITA can increase this ratio without severely impairing virus release as well the novel mechanism by which CIITA increases Gag-Pol levels. Preliminary studies in this laboratory suggest that CIITA enhancement Gag-Pol may be due to increased ribosomal frameshifting (data not shown).

Finally, it is tempting to speculate that CIITA, which is expressed upon CD4+ T cell activation and increases viral protease levels, may also contribute to Casp8p41-mediated apoptosis, which may link CIITA to the decimation of T cells in the GALT during primary viremia [67]. Thymic epithelial cells [68], cervical epithelial cells [69], human colonic epithelial cells [70] and oral keratinocytes (normal human oral epithelial cells) [71] have all demonstrated *in vitro* the capability of being productively infected with HIV. Infection of epithelial cells provides potential *in vivo* significance to this study, especially considering that thymic epithelial cells constitutively express MHC class II (and thus CIITA) [28]. In addition, most other cells can be stimulated to express CIITA in the presence of IFN- $\gamma$  (i.e. a pro-inflammatory environment), which is induced during HIV infection of the GALT [72]. Overall, this study demonstrates that the function of CIITA may be more broad than previously thought. Given this previously undescribed role in enhancement of virion maturation, the precise consequences of CIITA expression during the HIV replicative cycle may provide rationale for the development of novel antiviral therapeutics.

## Materials and Methods

### Cell Culture

A293T cells [73] were maintained as previously described [74] and CIITA-stable A293T cell lines were generated by co-transfecting PVU I linearized pDNA3.FLAG.CIITA8 [75] and pCMV4His, a mammalian selection vector which encodes the histidinol dehydrogenase gene under control of the CMV promoter into the cells. Stable clones were selected in DMEM medium containing 5 mM L-histidinol (Sigma-Aldrich., St. Louis, MO) and cloned by limiting dilution assay. GHOST cell medium was supplemented with 0.2 mg/ml G418, 0.1 mg/ml hygromycin B and 1  $\mu$ g/ml puromycin (Sigma) as previously described [76].

### Cloning and transfections

Using cDNA reverse transcribed from A293T-CIITA RNA, we amplified HLA-DR $\alpha$ , HLA-DR $\beta$ 1 and HLA-DR $\beta$ 5 sequences (GenBank accession nos. [NM019111](#), [NM002121](#), and [NM002125](#), respectively), using primers containing forward restriction site XbaI and the reverse restriction site HindIII (Table S1). The haplotyping of HLA-DR isotypes expressed by A293T cells was determined by the Transplantation Immunology Lab, Albany Medical College. Primers were designed to include an intact Kozak sequence upstream of the translation start site. HLA-DR $\alpha$  and  $\beta$ 5 plasmids were then used for site-directed mutagenesis using primers indicated (Table S1). Transient transfections of all plasmids, including: pDNA3.FLAG.CIITA8 [75], CIITA-GTP2 and -GTP3 [56] and CIITA -L1035P [58], p33-143 (coding for the p33 and p35 isoforms of invariant chain—a kind gift provided by Dr. Eric O. Long, NIAID), HLA-DM $\alpha$  and  $\beta$  (pMCFR-PAC and pDM $\beta$ /MCFR—kindly provided by Dr. Lisa K. Denzin, Sloan-Kettering Cancer Center), eGFP-Rab4B (kindly provided by Dr. Marci Scidmore, Cornell University), and HIV Gag-iGFP [77] (kindly provided by Dr. Benjamin Chen, Mount Siani School of Medicine) were performed using a 3:1 ratio Fugene HD Transfection Reagent to DNA in serum-free media as suggested by the manufacturer (Roche, Indianapolis, IN). Virus plasmid DNA provided half of total DNA used in transfection reactions.

NIH 3T3 Balb/c cells are transfected with 1.5  $\mu$ g CIITA and 4.5  $\mu$ L FuGene HD (7:2 ratio of FuGene to DNA for optimal cells growth) and selected for with L-histidinol for two weeks and analyzed for MHC II expressing using fluorescence-activated cell sorter (FACS) with PE-conjugated mouse IgG2a (Cedar Lane) against I-A<sup>d</sup> and clones were selected by limiting dilution. These cells were co-transfected with p32cDNA and pCHIV PAL (which contains all HIV genes except the LTR sequences) at a 2:1 ratio. The p32cDNA was donated by the Peterlin laboratory [59]. Both MHC II expressing VLPs and MHC II-negative VLPs were produced and concentrated 10-fold in a 100 K molecular weight cut-off filter tube (Millipore) for 15 minutes at 4000 rpm prior to titering via HIV-1 p24 CA Antigen Capture Assay Kit were performed following the manufacturer's instructions (NIH AIDS Research and Reference Reagent Program).

### RNA Extraction

Cytoplasmic RNA from 48 hr cultures of each cell type was collected using the RNeasy Mini Kit according to manufacturer's instructions (Qiagen, Inc., Valencia, CA).

### RT-PCR

1  $\mu$ g of DNA-free RNA was run out on a non-denaturing gel to ensure equal concentrations of each sample followed by reverse transcription of 1  $\mu$ g of each RNA sample using the iScript cDNA synthesis kit, following manufacturer's instructions (BioRad, Hercules,

CA). 50 ng of cDNA was used to amplify *HLA-DM*, *CIITA*, *gapdh*, and *β-actin* from each cell type to confirm expression. Forward and reverse primer sequences used in RT-PCR experiments indicated in Table S1.

### Flow Cytometry

Cells were analyzed for HLA-DR expression as previously described [56]. Briefly, cells were incubated with murine clone L243 [78] hybridoma (ATCC, Manassas, VA) supernatant diluted 1:10 in PBS/2% FBS for 30 minutes on ice, washed, and then incubated with goat-anti-mouse Alexa-Fluor 488- or Alexa-Fluor 647-conjugated secondary antibody (Molecular Probes/Invitrogen) diluted 1:100 in PBS/2% FBS for 20 minutes on ice in the dark. Alternatively, the cells were incubated with L243 monoclonal antibody conjugated to AlexaFluor 488 or 647 (BioLegend) diluted 1:50 in PBS/2% FBS for 40 minutes on ice in the dark. Cells were then analyzed with the FACSCanto (BD Biosciences, San Jose, CA) and further analyzed with FloJo 7.2.2 software (Tree Star, Inc, Ashland, OR). For Gag retention experiments, live cells were gated, followed by gating of DR+ cells and then the percentage of Gag and Gag<sup>hi</sup> cells were gated. Microscopy on the same samples was performed using Leica L2 microscope (Leica Microsystems Wetzlar GmbH, Wetzlar, Germany).

### Western blotting

(1:000) of mouse anti-human Rab4 (BD, Franklin Lakes, NJ), rabbit anti-human β-actin (Cell Signaling Tech., Danvers, MA), (1:200) HIV-1 p24 hybridoma supernatant (183-H12-5C)[79], (1:10,000, NIH AIDS Research and Reference Reagent Program, Germantown, MD) and (1:1000) mouse anti-FLAG M2 (Sigma). Secondary antibodies used: HRP conjugated, Goat anti-Mouse IgG and Goat anti-Rabbit IgG (Zymed grade) or (Invitrogen, Carlsbad, CA). Densitometric analysis was performed as previously described [80] and the percentage of total HIV-1 α CA p24 (183-H12-5C) [79] reactive bands was used as a measure of Gag processing [81].

### Intracellular Gag staining

10<sup>6</sup> cells were permeabilized with IntraPrep Permeabilization Reagent (Beckman-Coulter, Fullerton, CA), following manufacturer's instructions. Gag was stained with FITC-conjugated FH190-1-1 (Beckman-Coulter) for approximately 15 m prior to analysis and data interpretation as performed above, with the exception of the percentage of Gag+ cells was determined after gating on HLA-DR+ cells.

### Virus purification and titering

Virions were purified using the μMACS Streptavidin Kit (Miltenyi Biotec Inc., Auburn, CA), according to the manufacturer's instructions using biotinylated-L243 (Biolegend). GHOST assay [82] to determine infectious virus production and p24 ELISAs to determine virus particle release using the HIV-1 p24 CA Antigen Capture Assay Kit were performed following the manufacturer's instructions (NIH AIDS Research and Reference Reagent Program).

### Protease inhibition

Cells were transfected with either pcCIITA or empty pcDNA vector 4.5 hours prior to Lopinavir (NIH AIDS Research and Reference Reagent Program) or DMSO (vehicle-only) treatment at indicated concentrations. Virus and cell supernatants were collected approximately 17 hours post-treatment. For determina-

tion of p160Gag-Pol to p55Gag ratios, producer cells were transfected with CIITA constructs (pcCIITA, GTP2, GTP3, L1035P) or vector only control (pcDNA) and then transfected with pNL4-3 16 hours later, prior to being treated with 80 nM Lopinavir. Cell lysates were used to monitor the levels of Pr55Gag to Pr160Pol via western blotting with HIV-1 α CA p24 (183-H12-5C) after 17 hours.

## Supporting Information

**Table S1** Primers used in this study.

Found at: doi:10.1371/journal.pone.0011304.s001 (0.06 MB DOC)

**Figure S1** Gene expression analysis via semi-quantitative PCR was performed on A293T cells transfected with the indicated constructs (A), where the Hut78 T cell line served as a positive control. Expression of HLA-DR on the surface of cells transfected with the indicated plasmids was assessed by flow cytometry (B). Found at: doi:10.1371/journal.pone.0011304.s002 (0.71 MB DOC)

**Figure S2** Virus titers were determined at 48 h.p.t. following transfection with indicated plasmids and HIV<sub>NL4-3</sub>, as determined by GHOST infectivity assays and p24 ELISA. Standard deviation of the mean for 3 independent experiments is presented. Found at: doi:10.1371/journal.pone.0011304.s003 (0.07 MB DOC)

**Figure S3** Representative blot of Gag processing in virions from cells treated with indicated concentrations of Lopinavir, where Vehicle = vehicle only (DMSO). Found at: doi:10.1371/journal.pone.0011304.s004 (0.41 MB DOC)

**Figure S4** Gag processing of virions from cells transfected with indicated constructs and HIV<sub>NL4-3</sub> was measured via western blotting with antibody against CAp24 followed by densitometric analysis of Gag cleavage products. Found at: doi:10.1371/journal.pone.0011304.s005 (0.07 MB DOC)

**Figure S5** p32cDNA and pcHIV PAL were cotransfected into the indicated NIH 3T3 Balb/c cells. At 3 d.p.t. virus containing supernatants were used for titering via p24 ELISA assay. Data is representative of three independent experiments, where error bars indicate standard error. Found at: doi:10.1371/journal.pone.0011304.s006 (0.03 MB DOC)

## Acknowledgments

Thanks to Dr. James Drake and Dr. Carlos de Noronha for critical review of the manuscript. Thanks to Walter Losure and Chelsea Corell for excellent technical support. The following reagents were obtained through the NIH AIDS Research and Reference Reagent Program, Division of AIDS, NIAID,NIH: GHOST cells from Dr. Vineet N. Kewal Ramani and Dr. Dan R. Littman, Lopinavir, HIV-1 Protease Antiserum from Dr. D. Bailey and Dr. Mark Page, HIV-1 p24 monoclonal antibody (183-H12-5C) from Dr. Bruce Chesebro and Kathy Wehrly.

## Author Contributions

Conceived and designed the experiments: KAP, JAH, KMD. Performed the experiments: KAP, LNK, AG, KMD. Analyzed the data: KAP, JAH, KMD. Contributed reagents/materials/analysis tools: JAH, KMD. Wrote the paper: KAP, JAH, KMD.

## References

- Freed EO (1998) HIV-1 gag proteins: diverse functions in the virus life cycle. *Virology* 251: 1–15.
- Carter CA (2002) Tsg101: HIV-1's ticket to ride. *Trends in Microbiology* 10: 203–205.
- Garrus JE, von Schwedler UK, Pornillos OW, Morham SG, Zavitz KH, et al. (2001) Tsg101 and the vacuolar protein sorting pathway are essential for HIV-1 budding. *Cell* 107: 55–65.
- Pornillos O, Higginson DS, Stray KM, Fisher RD, Garrus JE, et al. (2003) HIV Gag mimics the Tsg101-recruiting activity of the human Hrs protein. *J Cell Biol* 162: 425–434.
- Kaplan AH, Manchester M, Swanstrom R (1994) The activity of the protease of human immunodeficiency virus type 1 is initiated at the membrane of infected cells before the release of viral proteins and is required for release to occur with maximum efficiency. *J Virol* 68: 6782–6786.
- Kaplan AH, Zack JA, Knigge M, Paul DA, Kempf DJ, et al. (1993) Partial inhibition of the human immunodeficiency virus type 1 protease results in aberrant virus assembly and the formation of noninfectious particles. *J Virol* 67: 4050–4055.
- Mueller B, Anders M, Akiyama H, Welsch S, Glass B, et al. (2009) Human immunodeficiency virus (HIV-1) Gag processing intermediates trans-dominantly interfere with HIV-1 infectivity. *J Biol Chem*.
- Finzi A, Brunet A, Xiao Y, Thibodeau J, Cohen EA (2006) Major Histocompatibility Complex Class II Molecules Promote Human Immunodeficiency Virus Type 1 Assembly and Budding to Late Endosomal/Multivesicular Body Compartments. *J Virol* 80: 9789–9797.
- Grigorov B, Arcanger F, Roingeard P, Darlix J-L, Muriaux D (2006) Assembly of Infectious HIV-1 in Human Epithelial and T-Lymphoblastic Cell Lines. *Journal of Molecular Biology* 359: 848–862.
- Morita E, Sundquist WI (2004) RETROVIRUS BUDDING. *Annual Review of Cell and Developmental Biology* 20: 395–425.
- Pelchen-Matthews A, Kramer B, Marsh M (2003) Infectious HIV-1 assembles in late endosomes in primary macrophages. *J Cell Biol* 162: 443–455.
- Welsch S, Muller B, Krausslich H-G (2007) More than one door - Budding of enveloped viruses through cellular membranes. *FEBS Letters* 581: 2089–2097.
- Demirov DG, Freed EO (2004) Retrovirus budding. *Virus Research* 106: 87–102.
- Finzi A, Orthwein A, Mercier J, Cohen EA (2007) Productive human immunodeficiency virus type 1 assembly takes place at the plasma membrane. *J Virol* 81: 7476–7490.
- Joshi A, Ablan SD, Soheiliani F, Nagashima K, Freed EO (2009) Evidence that productive human immunodeficiency virus type 1 assembly can occur in an intracellular compartment. *J Virol* 83: 5375–5387.
- Bieniasz PD (2009) The Cell Biology of HIV-1 Virion Genesis. *Cell Host & Microbe* 5: 550–558.
- Pelchen-Matthews A, Raposo G, Marsh M (2004) Endosomes, exosomes and Trojan viruses. *Trends in Microbiology* 12: 310–316.
- Klein KC, Reed JC, Lingappa JR (2007) Intracellular destinies: degradation, targeting, assembly, and endocytosis of HIV Gag. *AIDS Rev* 9: 150–161.
- Harila K, Prior I, Sjoberg M, Salminen A, Hinkula J, et al. (2006) Vpu and Tsg101 Regulate Intracellular Targeting of the Human Immunodeficiency Virus Type 1 Core Protein Precursor Pr55gag. *J Virol* 80: 3765–3772.
- Jouvenet N, Neil SJ, Bess C, Johnson MC, Virgen CA, et al. (2006) Plasma membrane is the site of productive HIV-1 particle assembly. *PLoS Biol* 4: e435.
- Molle D, Segura-Morales C, Camus G, Berlioz-Torrent C, Kjems J, et al. (2009) Endosomal trafficking of HIV-1 GAG and genomic RNAs regulates viral egress. *J Biol Chem*. pp M109.019844.
- Berger AC, Roche PA (2009) MHC class II transport at a glance. *J Cell Sci* 122: 1–4.
- Krawczyk M, Reith W (2006) Regulation of MHC class II expression, a unique regulatory system identified by the study of a primary immunodeficiency disease. *Tissue Antigens* 67: 183–197.
- Ting JP, Trowsdale J (2002) Genetic control of MHC class II expression. *Cell* 109 Suppl: S21–33.
- SLG-L, Waldburger J, Krawczyk M, Otten LA, Suter T, et al. (2004) Mini-review: Specificity and expression of CIITA, the master regulator of MHC class II genes. *European Journal of Immunology* 34: 1513–1525.
- Ting JP-Y, Trowsdale J (2002) Genetic Control of MHC Class II Expression. *Cell* 109: S21–S33.
- Holling TM, Van der Stoep N, Van den Elsen PJ (2004) Epigenetic control of CIITA expression in leukemic T cells. *Biochemical Pharmacology* 68: 1209–1213.
- Holling TM, Schooten E, van Den Elsen PJ (2004) Function and regulation of MHC class II molecules in T-lymphocytes: of mice and men. *Human Immunology* 65: 282–290.
- Hiltbold EM, Roche PA (2002) Trafficking of MHC class II molecules in the late secretory pathway. *Current Opinion in Immunology* 14: 30–35.
- Rocha N, Neefjes J (2008) MHC class II molecules on the move for successful antigen presentation. *Embo J* 27: 1–5.
- Busch R, Rinderknecht CH, Roh S, Lee AW, Harding JJ, et al. (2005) Achieving stability through editing and chaperoning: regulation of MHC class II peptide binding and expression. *Immunological Reviews* 207: 242–260.
- Davies MN, Lamikanra A, Sansom CE, Flower DR, Moss DS, et al. (2007) Identification of the HLA-DM/HLA-DR interface. *Molecular Immunology In Press*, Corrected Proof.
- Denzin LK, Cresswell P (1995) HLA-DM induces clip dissociation from MHC class II [alpha][beta] dimers and facilitates peptide loading. *Cell* 82: 155–165.
- Elliott EA, Drake JR, Amigorena S, Elsemore J, Webster P, et al. (1994) The invariant chain is required for intracellular transport and function of major histocompatibility complex class II molecules. *J Exp Med* 179: 681–694.
- Shin JS, Ebersold M, Pypaert M, Delamarre L, Hartley A, et al. (2006) Surface expression of MHC class II in dendritic cells is controlled by regulated ubiquitination. *Nature* 444: 115–118.
- van Niel G, Wubbolts R, ten Broeke T, Buschow SI, Ossendorp FA, et al. (2006) Dendritic Cells Regulate Exposure of MHC Class II at Their Plasma Membrane by Oligoubiquitination. *Immunity* 25: 885–894.
- Stumpfner-Cuvellette P, Jouve M, Helft J, Dugast M, Glouzman A-S, et al. (2003) Human Immunodeficiency Virus-1 Nef Expression Induces Intracellular Accumulation of Multivesicular Bodies and Major Histocompatibility Complex Class II Complexes: Potential Role of Phosphatidylinositol 3-Kinase. *Mol Biol Cell* 14: 4857–4870.
- Hussain A, Wesley C, Khalid M, Chaudhry A, Jameel S (2008) Human Immunodeficiency Virus Type 1 Vpu Protein Interacts with CD74 and Modulates Major Histocompatibility Complex Class II Presentation. *J Virol* 82: 893–902.
- Schindler M, Wurfl S, Benaroch P, Greenough TC, Daniels R, et al. (2003) Down-Modulation of Mature Major Histocompatibility Complex Class II and Up-Regulation of Invariant Chain Cell Surface Expression Are Well-Conserved Functions of Human and Simian Immunodeficiency Virus nef Alleles. *J Virol* 77: 10548–10556.
- Gluschankof P, Suzan M (2002) HIV-1 Gag Polyprotein Rescues HLA-DR Intracellular Transport in a Human CD4+ Cell Line. *Virology* 300: 160–169.
- Esser MT, Graham DR, Coren LV, Trubey CM, Bess JW, Jr., et al. (2001) Differential Incorporation of CD45, CD80 (B7-1), CD86 (B7-2), and Major Histocompatibility Complex Class I and II Molecules into Human Immunodeficiency Virus Type 1 Virions and Microvesicles: Implications for Viral Pathogenesis and Immune Regulation. *J Virol* 75: 6173–6182.
- Holm GH, Gabuzda D (2005) Distinct Mechanisms of CD4+ and CD8+ T-Cell Activation and Bystander Apoptosis Induced by Human Immunodeficiency Virus Type 1 Virions. *J Virol* 79: 6299–6311.
- Lipman MC (2001) MHC Class II and HIV pathogenesis: lots of data, few conclusions. *Eur J Clin Invest* 31: 926–927.
- Krawczyk M, Leimgruber E, Seguin-Estevez Q, Dunand-Sauthier I, Barras E, et al. (2007) Expression of RAB4B, a protein governing endocytic recycling, is co-regulated with MHC class II genes. *Nucleic Acids Res* 35: 595–605.
- Cantin R, Fortin JF, Lamontagne G, Tremblay M (1997) The presence of host-derived HLA-DR1 on human immunodeficiency virus type 1 increases viral infectivity. *J Virol* 71: 1922–1930.
- Cantin R, Fortin J-F, Lamontagne G, Tremblay M (1997) The Acquisition of Host-Derived Major Histocompatibility Complex Class II Glycoproteins by Human Immunodeficiency Virus Type 1 Accelerates the Process of Virus Entry and Infection in Human T-Lymphoid Cells. *Blood* 90: 1091–1100.
- Krawczyk M, Seguin-Estevez Q, Leimgruber E, Sperisen P, Schmid C, et al. (2008) Identification of CIITA regulated genetic module dedicated for antigen presentation. *PLoS Genet* 4: e1000058.
- Molle D, Segura-Morales C, Camus G, Berlioz-Torrent C, Kjems J, et al. (2009) Endosomal trafficking of HIV-1 GAG and genomic RNAs regulates viral egress. *J Biol Chem*.
- Lindhofer H, Von Der Helm K, Nitschko H (1995) In Vivo Processing of Pr160gag-polfrom Human Immunodeficiency Virus Type 1 (HIV) in Acutely Infected, Cultured Human T-Lymphocytes. *Virology* 214: 624–627.
- Speck RR, Flexner C, Tian CJ, Yu XF (2000) Comparison of human immunodeficiency virus type 1 Pr55(Gag) and Pr160(Gag-pol) processing intermediates that accumulate in primary and transformed cells treated with peptidic and nonpeptidic protease inhibitors. *Antimicrob Agents Chemother* 44: 1397–1403.
- Brierley I, Dos Ramos FJ (2006) Programmed ribosomal frameshifting in HIV-1 and the SARS-CoV. *Virus Res* 119: 29–42.
- Arthur LO, Bess JW, Jr., Sowder RC, 2nd, Benveniste RE, Mann DL, et al. (1992) Cellular proteins bound to immunodeficiency viruses: implications for pathogenesis and vaccines. *Science* 258: 1935–1938.
- Darke PL, Nutt RF, Brady SF, Garsky VM, Ciccarone TM, et al. (1988) HIV-1 protease specificity of peptide cleavage is sufficient for processing of gag and pol polyproteins. *Biochemical and Biophysical Research Communications* 156: 297–303.
- Petit SC, Sheng N, Tritch R, Erickson-Vitonen S, Swanstrom R (1998) The regulation of sequential processing of HIV-1 Gag by the viral protease. *Adv Exp Med Biol* 436: 15–25.
- Loeb DD, Swanstrom R, Everitt L, Manchester M, Stamper SE, et al. (1989) Complete mutagenesis of the HIV-1 protease. *Nature* 340: 397–400.
- Harton JA, Cressman DE, Chin KC, Der CJ, Ting JP (1999) GTP binding by class II transactivator: role in nuclear import. *Science* 285: 1402–1405.

57. Bewry NN, Bolick SC, Wright KL, Harton JA (2007) GTP-dependent recruitment of CIITA to the class II major histocompatibility complex promoter. *J Biol Chem* 282: 26178–26184.
58. Harton JA, O'Connor W, Conti BJ, Linhoff MW, Ting JPY (2002) Leucine-rich repeats of the class II transactivator control its rate of nuclear accumulation. *Human Immunology* 63: 588–601.
59. Zheng YH, Yu HF, Peterlin BM (2003) Human p32 protein relieves a post-transcriptional block to HIV replication in murine cells. *Nat Cell Biol* 5: 611–618.
60. Blanco R, Carrasco L, Ventoso In (2003) Cell Killing by HIV-1 Protease. *Journal of Biological Chemistry* 278: 1086–1093.
61. Park J, Morrow CD (1991) Overexpression of the gag-pol precursor from human immunodeficiency virus type 1 proviral genomes results in efficient proteolytic processing in the absence of virion production. *J Virol* 65: 5111–5117.
62. Shehu-Xhilaga M, Crowe SM, Mak J (2001) Maintenance of the Gag/Gag-Pol Ratio Is Important for Human Immunodeficiency Virus Type 1 RNA Dimerization and Viral Infectivity. *J Virol* 75: 1834–1841.
63. Biswas P, Jiang X, Pacchia AL, Dougherty JP, Peltz SW (2004) The Human Immunodeficiency Virus Type 1 Ribosomal Frameshifting Site Is an Invariant Sequence Determinant and an Important Target for Antiviral Therapy. *J Virol* 78: 2082–2087.
64. Chaudhry A, Vergheze DA, Das SR, Jameel S, George A, et al. (2009) HIV-1 Nef Promotes Endocytosis of Cell Surface MHC Class II Molecules via a Constitutive Pathway. *J Immunol* 183: 2415–2424.
65. Rulli Jr. SJ, Muriaux D, Nagashima K, Mirro J, Oshima M, et al. (2006) Mutant murine leukemia virus Gag proteins lacking proline at the N-terminus of the capsid domain block infectivity in virions containing wild-type Gag. *Virology* 347: 364–371.
66. Nie Z, Phenix BN, Lum JJ, Alam A, Lynch DH, et al. (2002) HIV-1 protease processes procaspase 8 to cause mitochondrial release of cytochrome c, caspase cleavage and nuclear fragmentation. *Cell Death Differ* 9: 1172–1184.
67. Mehandru S, Tenner-Racz K, Racz P, Markowitz M (2005) The gastrointestinal tract is critical to the pathogenesis of acute HIV-1 infection. *J Allergy Clin Immunol* 116: 419–422.
68. Fauci AS, Pantaleo G, Stanley S, Weissman D (1996) Immunopathogenic Mechanisms of HIV Infection. *Annals of Internal Medicine* 124: 654–663.
69. Tan X, Pearce-Pratt R, Phillips DM (1993) Productive infection of a cervical epithelial cell line with human immunodeficiency virus: implications for sexual transmission. *J Virol* 67: 6447–6452.
70. Yahi N, Baghdiguian S, Moreau H, Fantini J (1992) Galactosyl ceramide (or a closely related molecule) is the receptor for human immunodeficiency virus type 1 on human colon epithelial HT29 cells. *J Virol* 66: 4848–4854.
71. Liu X, Zha J, Chen H, Nishitani J, Camargo P, et al. (2003) Human Immunodeficiency Virus Type 1 Infection and Replication in Normal Human Oral Keratinocytes. *J Virol* 77: 3470–3476.
72. Shacklett BL, Anton PA (2010) HIV Infection and Gut Mucosal Immune Function: Updates on Pathogenesis with Implications for Management and Intervention. *Curr Infect Dis Rep* 12: 19–27.
73. Graham FL, Smiley J, Russell WC, Nairn R (1977) Characteristics of a human cell line transformed by DNA from human adenovirus type 5. *J Gen Virol* 36: 59–74.
74. Duus KM, Miller ED, Smith JA, Kovalev GI, Su L (2001) Separation of human immunodeficiency virus type 1 replication from nef-mediated pathogenesis in the human thymus. *J Virol* 75: 3916–3924.
75. Chin KC, Li GG, Ting JP (1997) Importance of acidic, proline/serine/threonine-rich, and GTP-binding regions in the major histocompatibility complex class II transactivator: generation of transdominant-negative mutants. *Proc Natl Acad Sci U S A* 94: 2501–2506.
76. Morner A, Bjorndal A, Albert J, Kewalramani VN, Littman DR, et al. (1999) Primary human immunodeficiency virus type 2 (HIV-2) isolates, like HIV-1 isolates, frequently use CCR5 but show promiscuity in coreceptor usage. *J Virol* 73: 2343–2349.
77. Chen P, Hubner W, Spinelli MA, Chen BK (2007) Predominant Mode of Human Immunodeficiency Virus Transfer between T Cells Is Mediated by Sustained Env-Dependent Neutralization-Resistant Virological Synapses. *J Virol* 81: 12582–12595.
78. Fu XT, Karr RW (1994) HLA-DR alpha chain residues located on the outer loops are involved in nonpolymorphic and polymorphic antibody-binding epitopes. *Hum Immunol* 39: 253–260.
79. Chesebro B, Wehrly K, Nishio J, Perryman S (1992) Macrophage-tropic human immunodeficiency virus isolates from different patients exhibit unusual V3 envelope sequence homogeneity in comparison with T-cell-tropic isolates: definition of critical amino acids involved in cell tropism. *J Virol* 66: 6547–6554.
80. Mattos-Graner RO, Porter KA, Smith DJ, Hosogi Y, Duncan MJ (2006) Functional analysis of glucan binding protein B from *Streptococcus mutans*. *J Bacteriol* 188: 3813–3825.
81. Mueller B, Anders M, Akiyama H, Welsch S, Glass B, et al. (2009) Human immunodeficiency virus (HIV-1) Gag processing intermediates trans-dominantly interfere with HIV-1 infectivity. *J Biol Chem*. pp M109.027144.
82. Meissner EG, Duus KM, Gao F, Yu X-F, Su L (2004) Characterization of a thymus-tropic HIV-1 isolate from a rapid progressor: role of the envelope. *Virology* 328: 74–88.
